# Supplementary material
Source: HighWire-hosted journal article supplement (https://jpet.aspetjournals.org/highwire/filestream/152027/field_highwire_adjunct_files/0/supp_figs_tables.pdf)
Supplement: supp_figs_tables.pdf [file supp_figs_tables.pdf]

**Supplementary Data**

**Chlorogenic acid inhibits epithelial-mesenchymal transition and invasion of breast cancer by down-regulating LRP6**

Wei Xue<sup>1,2,3#</sup>, Jie Hao<sup>1,2#</sup>, Qiuping Zhang<sup>1,2,4#</sup>, Ronghua Jin<sup>1</sup>, Zhuo Luo<sup>1</sup>, Xin Yang<sup>2</sup>,  
Yanying Liu<sup>1</sup>, Qinpei Lu<sup>1\*</sup>, Yiqiang Ouyang<sup>5\*</sup>, Hongwei Guo<sup>1,2\*</sup>

1 Guangxi Key Laboratory of Bioactive Molecules Research and Evaluation &  
College of Pharmacy, Guangxi Medical University, Nanning 530021, China

2 Key Laboratory of Longevity and Aging-related Diseases of Chinese Ministry of  
Education & Center for Translational Medicine, Guangxi Medical University,  
Nanning 530021, China

3 Department of Pharmacy, Ruikang Hospital Affiliated to Guangxi University of  
Chinese Medicine, Nanning, 530011, China

4 The First Affiliated Hospital of Guangxi Medical University, Nanning, 530021,  
China

5 Laboratory Animal Center, Guangxi Medical University, Nanning, 530021, China

**Supp. Fig. 1**

**A**

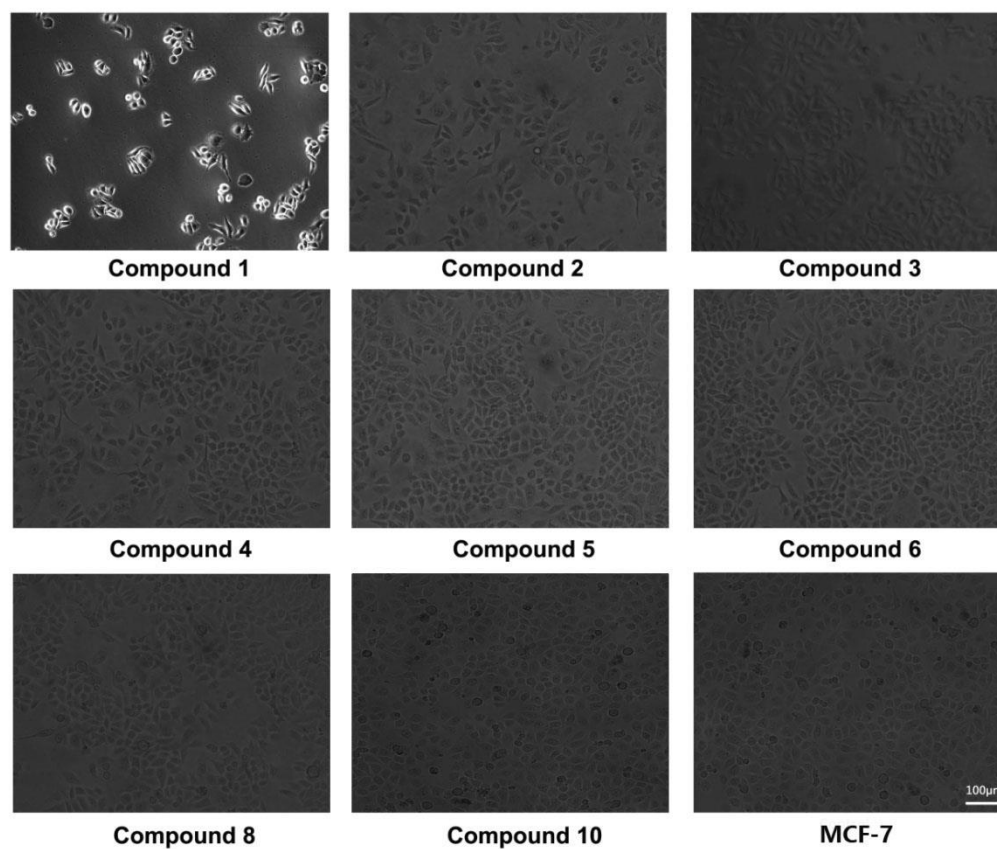

**Supplemental figure 1.** After 48 h treatment with 6.25  $\mu$ M small molecules, the morphology of MCF-7 cells was observed using a microscope (200  $\times$  magnification; scale bar = 100  $\mu$ m).

**Supp. Fig. 2**

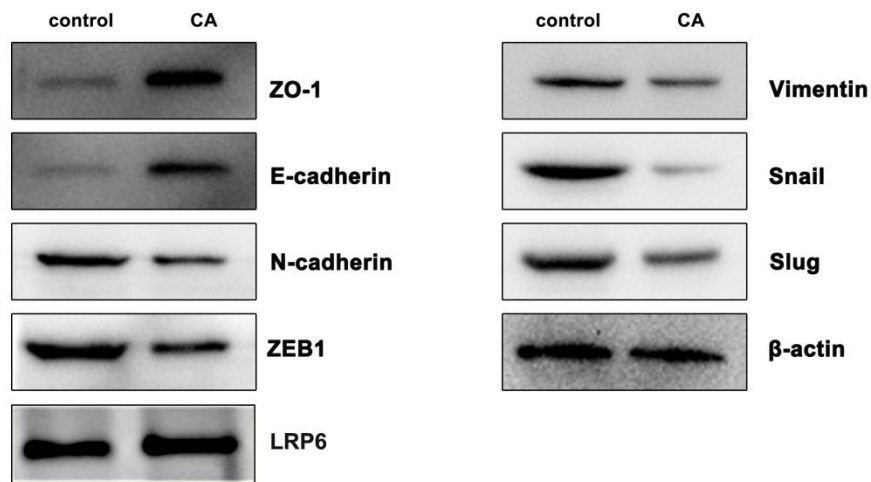

**Supplemental figure 2.** CA inhibited EMT in MDA-MB-231 cells. The expression of epithelial markers (ZO-1 and E-cadherin) and mesenchymal markers (N-cadherin, ZEB1, Vimentin, Snail, and Slug) was evaluated by Western blot experiment.

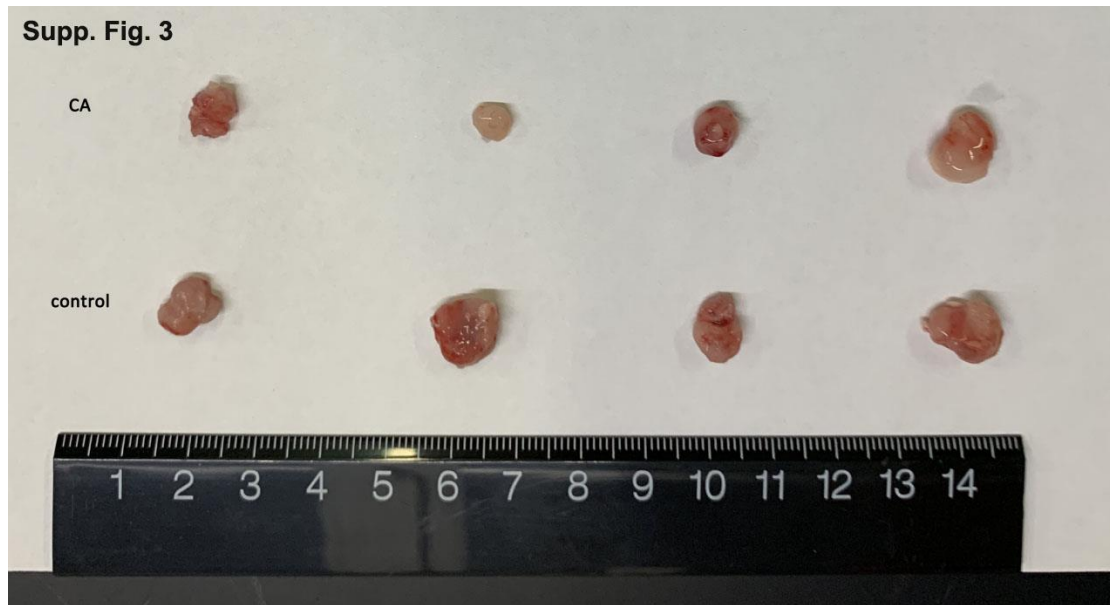

**Supplemental figure 3.** CA inhibited tumor growth in nude mouse xenograft model. Tumor tissue of mouse treated with CA was taken, and model group was the control group.

**Supp. Fig. 4**

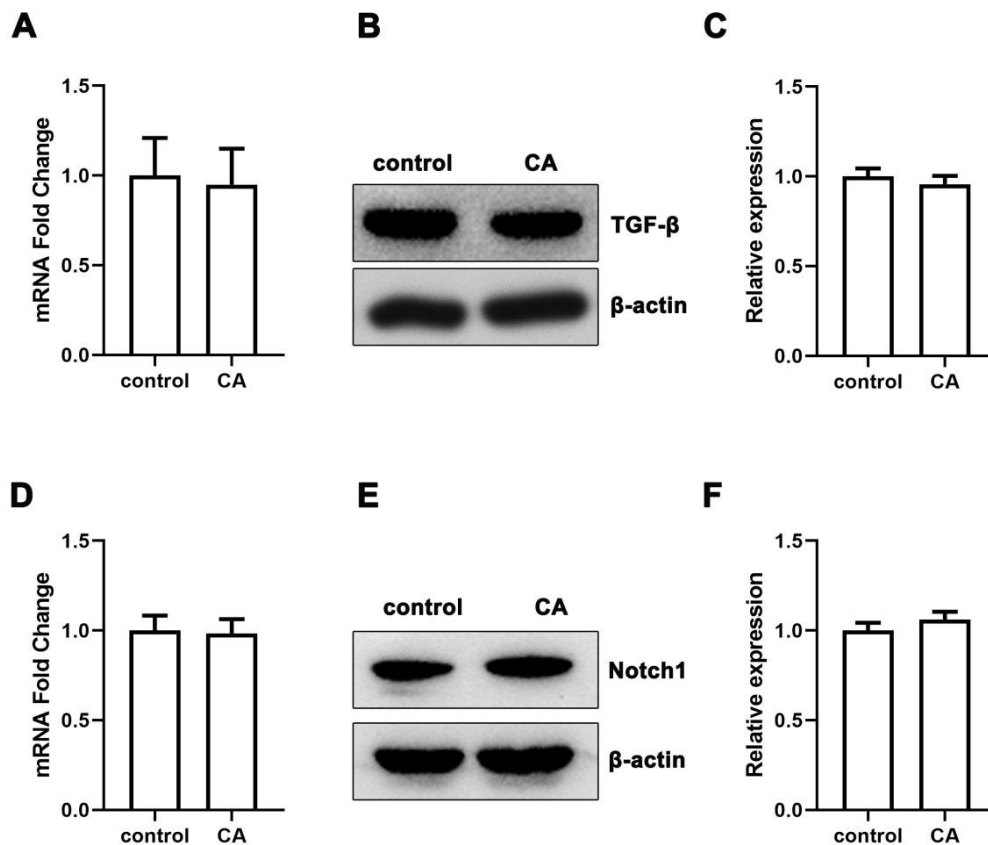

**Supplemental figure 4.** CA had no effect on TGF-β signaling and Notch1 signaling in MCF-7 cells. (A) The mRNA level of TGF-β was determined by qPCR assay. (B) The protein level of TGF-β was determined by Western blot assay. (C) Relative expression of TGF-β was quantified. (D) The mRNA level of Notch1 was determined by qPCR assay. (E) The protein level of Notch1 was determined by Western blot assay. (F) Relative expression of Notch1 was quantified. β-actin was considered as an internal control. Data are shown as the mean  $\pm$  SD (n=3). \* $P$ <0.05 and \*\* $P$ <0.01 versus the control group.

**Supplemental table 1.** Primers for qPCR assay.

| Gene       | Forward (5'-3')        | Reverse (5'-3')       |
|------------|------------------------|-----------------------|
| ZO-1       | GTGTTGTGGATACCTTGT     | GATGATGCCTCGTTCTAC    |
| E-cadherin | GGACTTTGGCGTGGGCCAGG   | CCCTGTCCAGCTCAGCCCGA  |
| N-cadherin | ACAGTGGCCACCTACAAAGG   | CCGAGATGGGGTTGATAATG  |
| ZEB1       | GCCAATAAGCAAACGATTCTG  | TTTGGCTGGATCACTTTCAAG |
| Vimentin   | GAGAACTTTGCCGTTGAAGC   | CTCAATGTCAAGGGCCATCT  |
| Snail      | CTGCGGGAAGGCCTTCTCT    | CGCCTGGCACTGGTACTTCTT |
| Slug       | TGTGTGGACTACCGCTGC     | TCCGGAAAGAGGAGAGAGG   |
| LRP6       | GATTATCCAGAAGGCATGGCAG | TCCCATCACCATCTTCCA    |
| GAPDH      | GGCCTCCAAGGAGTAAGACC   | AGGGGTCTACATGGCAACTG  |

**Supplemental table 2.** The viability of MCF-7 cells treated by the selected 10 small molecules.

| Concentration<br>( $\mu$ M) | Control<br>(%) | #1<br>(%) | #2<br>(%) | #3<br>(%) | #4<br>(%) | #5<br>(%) | #6<br>(%) | #7<br>(%) | #8<br>(%) | #10<br>(%) |
|-----------------------------|----------------|-----------|-----------|-----------|-----------|-----------|-----------|-----------|-----------|------------|
| 25                          | 100            | 76.71     | 41.81     | 1.99      | 93.92     | 38.40     | 60.66     | 76.27     | 36.09     | 83.57      |
| 12.5                        | 100            | 91.56     | 59.23     | 16.32     | 93.90     | 49.90     | 65.35     | 83.29     | 55.22     | 97.84      |
| 6.25                        | 100            | 90.84     | 81.14     | 104.24    | 95.84     | 76.62     | 78.61     | 86.63     | 78.50     | 91.37      |
